# Supplementary material for: Improving photosensitivity without changing thermal reactivity in photochromic diarylbenzenes based on accurate prediction by DFT calculations
Source: Royal Society of Chemistry journal article supplement (doi:10.1039/d0pp00024h), 2020-03-24
Supplement: d0pp00024h1.pdf [file d0pp00024h1.pdf]

Supporting Information for

# Improving Photosensitivity without Changing Thermal Reactivity in Photochromic Diarylbenzenes Based on Accurate Prediction by DFT Calculations

Daichi Kitagawa\*, Naoko Takahashi, Tatsumoto Nakahama, and Seiya Kobatake\*

Department of Applied Chemistry, Graduate School of Engineering, Osaka City University, 3-3-  
138 Sugimoto, Sumiyoshi-ku, Osaka 558-8585, Japan

\*E-mail: [kitagawa@osaka-cu.ac.jp](mailto:kitagawa@osaka-cu.ac.jp); [kobatake@a-chem.eng.osaka-cu.ac.jp](mailto:kobatake@a-chem.eng.osaka-cu.ac.jp)

**Table S1.** Oscillator strength of **1a**, **5a**, and **6a** calculated by time-dependent density functional theory (TD-DFT) at the MPW1PW91/6-31G(d)//M06-2X/6-31G(d) level.

| <b>1a</b>         |                        | <b>5a</b>         |                        | <b>6a</b>         |                        |
|-------------------|------------------------|-------------------|------------------------|-------------------|------------------------|
| Wavelength<br>/nm | Oscillator<br>Strength | Wavelength<br>/nm | Oscillator<br>Strength | Wavelength<br>/nm | Oscillator<br>Strength |
| 306.2             | 0.050                  | 328.6             | 0.281                  | 356.0             | 1.273                  |
| 290.1             | 0.019                  | 312.2             | 0.022                  | 339.7             | 0.046                  |
| 286.8             | 0.649                  | 302.2             | 0.697                  | 326.9             | 0.028                  |
| 274.3             | 0.001                  | 301.6             | 0.021                  | 325.7             | 0.639                  |
| 267.3             | 0.046                  | 290.8             | 0.160                  | 314.3             | 0.029                  |
| 264.5             | 0.368                  | 277.5             | 0.079                  | 295.4             | 0.026                  |

**Table S2.** The Results for the TDDFT calculation of **1a**, **5a**, and **6a**.

Excitation energies and oscillator strengths of **1a**:

Excited State 1: Singlet-A 4.0496 eV 306.17 nm f=0.0504  $\langle S^{*2} \rangle = 0.000$

127 ->128 0.65550

127 ->130 -0.24858

This state for optimization and/or second-order correction.

Total Energy, E(TD-HF/TD-KS) = -2273.06566911

Copying the excited state density for this state as the 1-particle RhoCI density.

Excited State 2: Singlet-A 4.2746 eV 290.05 nm f=0.0191  $\langle S^{*2} \rangle = 0.000$

126 ->128 -0.23228

126 ->130 0.11495

127 ->129 0.64198

Excited State 3: Singlet-A 4.3237 eV 286.76 nm f=0.6486  $\langle S^{*2} \rangle = 0.000$

127 ->128 0.25340

127 ->130 0.64431

Excited State 4: Singlet-A 4.5195 eV 274.33 nm f=0.0010  $\langle S^{*2} \rangle = 0.000$

126 ->128 0.61321

126 ->130 -0.19525

127 ->129 0.26393

Excited State 5: Singlet-A 4.6378 eV 267.33 nm f=0.0463 <S\*\*2>=0.000

124 ->128 -0.19924

126 ->130 -0.14930

127 ->131 0.63069

Excited State 6: Singlet-A 4.6877 eV 264.49 nm f=0.3684 <S\*\*2>=0.000

125 ->128 0.10755

126 ->129 0.68583

Excitation energies and oscillator strengths of **5a**:

Excited State 1: Singlet-A 3.7734 eV 328.57 nm f=0.2813 <S\*\*2>=0.000

137 ->138 0.68980

137 ->140 -0.13498

This state for optimization and/or second-order correction.

Total Energy, E(TD-HF/TD-KS) = -2993.25858826

Copying the excited state density for this state as the 1-particle RhoCI density.

Excited State 2: Singlet-A 3.9716 eV 312.18 nm f=0.0221 <S\*\*2>=0.000

136 ->138 -0.16737

137 ->139 0.67274

Excited State 3: Singlet-A 4.1034 eV 302.15 nm f=0.6966 <S\*\*2>=0.000

136 ->139 0.25461

137 ->138 0.12544

137 ->140 0.63777

Excited State 4: Singlet-A 4.1114 eV 301.56 nm f=0.0214 <S\*\*2>=0.000

136 ->138 0.66571

136 ->140 -0.11418

137 ->139 0.17922

Excited State 5: Singlet-A 4.2633 eV 290.82 nm f=0.1599 <S\*\*2>=0.000

136 ->139 0.64658

137 ->140 -0.24186

Excited State 6: Singlet-A 4.4682 eV 277.48 nm f=0.0792 <S\*\*2>=0.000

136 ->138 0.12035

136 ->140 0.57064

137 ->141 0.35803

Excitation energies and oscillator strengths of **6a**:

Excited State 1: Singlet-A 3.4830 eV 355.97 nm f=1.2730 <S\*\*2>=0.000

168 ->171 0.14252

169 ->170 0.68892

This state for optimization and/or second-order correction.

Total Energy, E(TD-HF/TD-KS) = -3376.66378857

Copying the excited state density for this state as the 1-particle RhoCI density.

Excited State 2: Singlet-A 3.6500 eV 339.69 nm f=0.0458 <S\*\*2>=0.000  
169 ->171 0.69660

Excited State 3: Singlet-A 3.7930 eV 326.87 nm f=0.0276 <S\*\*2>=0.000  
168 ->170 0.69453

Excited State 4: Singlet-A 3.8063 eV 325.74 nm f=0.6389 <S\*\*2>=0.000  
168 ->171 0.53399  
169 ->172 0.44050

Excited State 5: Singlet-A 3.9446 eV 314.32 nm f=0.0293 <S\*\*2>=0.000  
168 ->171 -0.42783  
169 ->170 0.10694  
169 ->172 0.53521

Excited State 6: Singlet-A 4.1969 eV 295.42 nm f=0.0259 <S\*\*2>=0.000  
168 ->172 0.66245  
169 ->173 0.16215

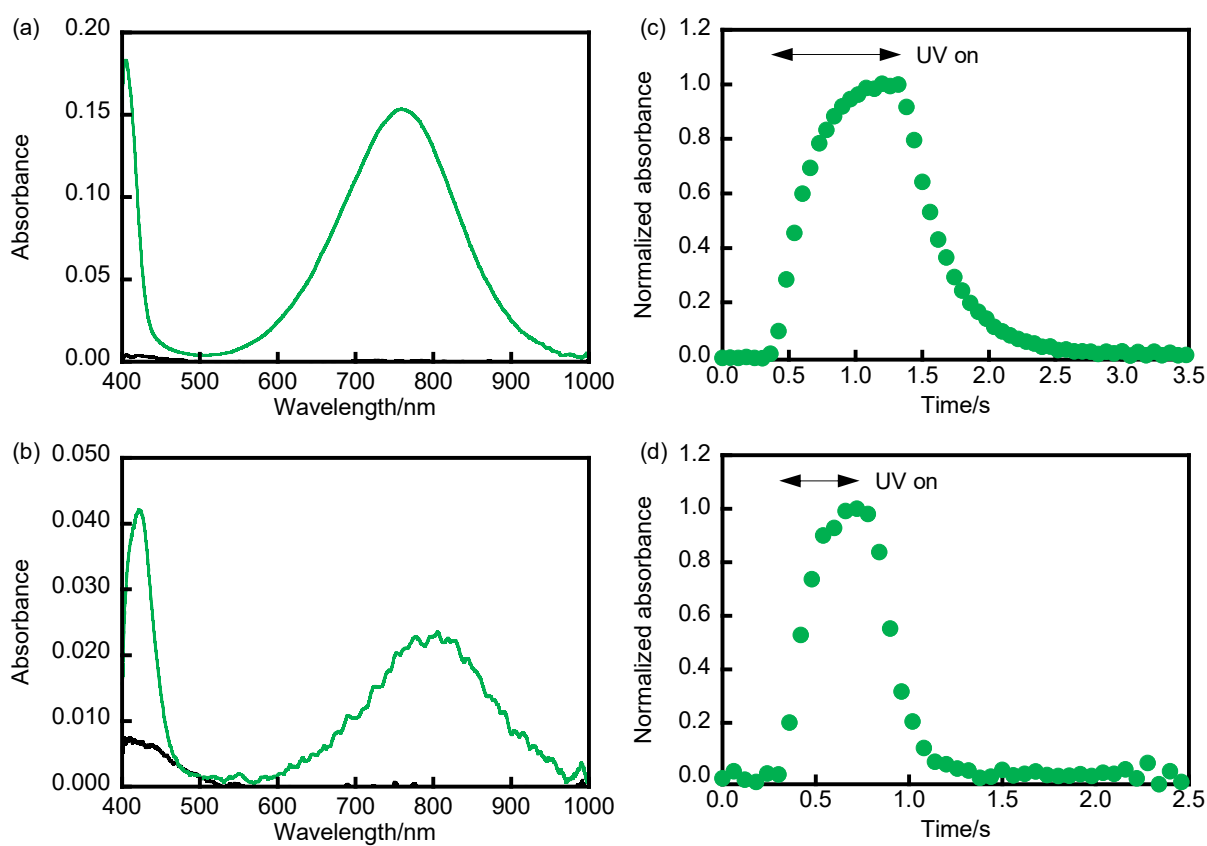

**Figure S1.** Absorption spectra of (a) **5b** ( $[5a] = 9.8 \times 10^{-5}$  M) and (b) **6b** ( $[6a] = 4.2 \times 10^{-5}$  M) in THF upon irradiation with 313 nm light at 298 K ( $69 \text{ mW cm}^{-2}$ ) and absorbance change of (c) **5b** and (d) **6b** in THF relative to time upon irradiation with 313 nm light ( $69 \text{ mW cm}^{-2}$ ) for 0.7 s (**5b**) and 0.3 s (**6b**) and thermal bleaching at 298 K. The data points of each absorbance were averaged over the data from 740 to 770 nm (**5b**) and from 775 to 805 nm (**6b**) and were recorded at 60 ms intervals for **5b** and **6b**.

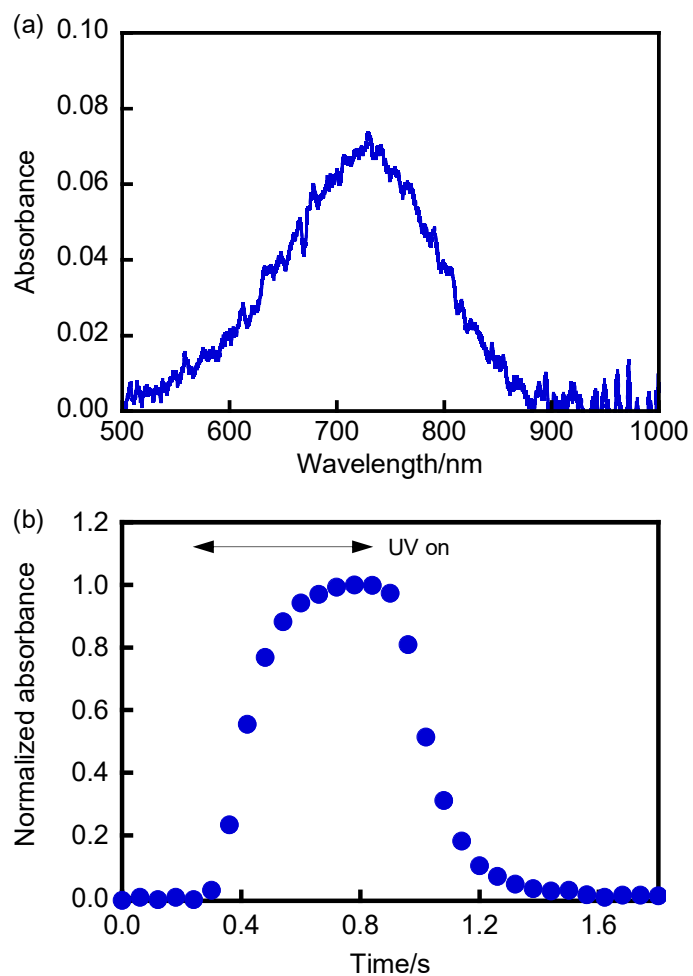

**Figure S2.** (a) Absorption spectra of **1b** in THF ( $[1a] = 3.8 \times 10^{-5}$  M) upon irradiation with 313 nm light at 298 K ( $69 \text{ mW cm}^{-2}$ ) and (b) absorbance change of **1b** in THF relative to time upon irradiation with 313 nm light ( $69 \text{ mW cm}^{-2}$ ) for 0.4 s and thermal bleaching at 298 K. The data points of each absorbance were averaged over the data from 710 to 740 nm and were recorded at 60 ms intervals.



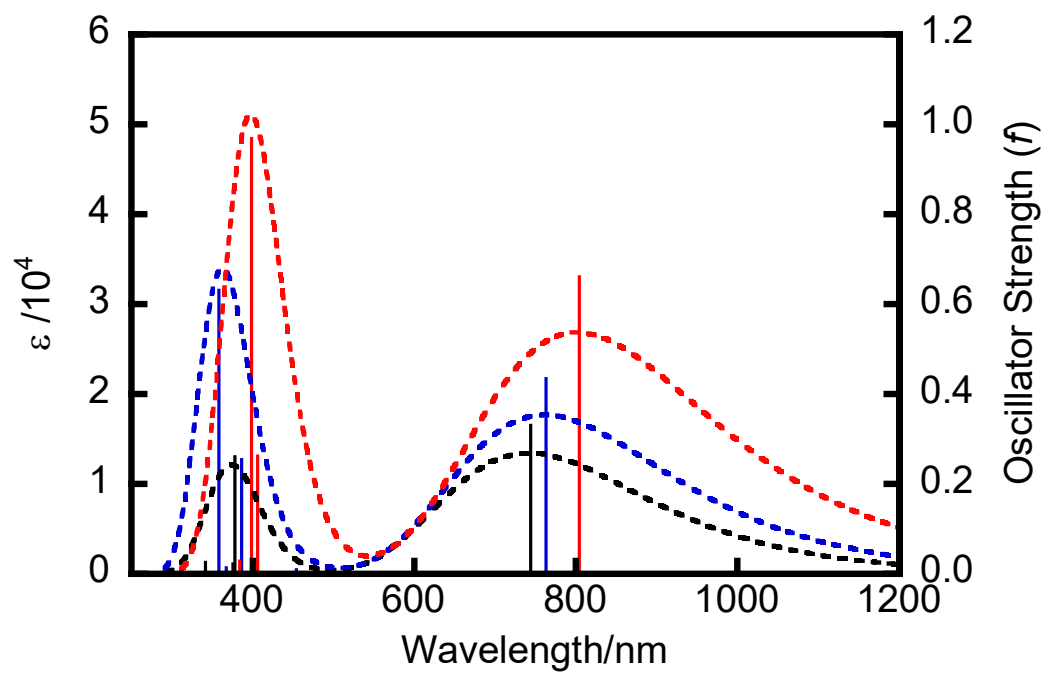

**Figure S3.** Calculated absorption spectra of **1b** (black), **5b** (blue), and **6b** (red) by TD-DFT (MPW1PW91/6-31G(d)//M06-2X/6-31G(d) level of the theory), modeled with a HWHM of 2000  $\text{cm}^{-1}$ .

**Table S3.** Oscillator strength of **1b**, **5b**, and **6b** calculated by time-dependent density functional theory (TD-DFT) at the MPW1PW91/6-31G(d)//M06-2X/6-31G(d) level.

| <b>1b</b>         |                        | <b>5b</b>         |                        | <b>6b</b>         |                        |
|-------------------|------------------------|-------------------|------------------------|-------------------|------------------------|
| Wavelength<br>/nm | Oscillator<br>Strength | Wavelength<br>/nm | Oscillator<br>Strength | Wavelength<br>/nm | Oscillator<br>Strength |
| 741.6             | 0.330                  | 761.1             | 0.434                  | 801.0             | 0.660                  |
| 428.6             | 0.001                  | 452.0             | 0.006                  | 488.1             | 0.016                  |
| 375.7             | 0.260                  | 389.7             | 0.003                  | 421.6             | 0.001                  |
| 373.7             | 0.020                  | 383.9             | 0.253                  | 402.8             | 0.261                  |
| 357.1             | 0.006                  | 364.6             | 0.015                  | 396.3             | 0.968                  |
| 339.5             | 0.026                  | 355.9             | 0.632                  | 381.0             | 0.030                  |

**Table S4.** HOMO and LUMO level data of the 1,2-diarylbenzenes calculated by DFT at the M06-2X/6-31G(d) level

| Compound  | $E_{\text{HOMO}}/\text{eV}$ | $E_{\text{LUMO}}/\text{eV}$ | $E_{\text{HOMO-LUMO}}/\text{eV}$ |
|-----------|-----------------------------|-----------------------------|----------------------------------|
| <b>1b</b> | -0.20479                    | -0.07654                    | -0.12825                         |
| <b>5b</b> | -0.19969                    | -0.07679                    | -0.12290                         |
| <b>6b</b> | -0.20060                    | -0.08152                    | -0.11908                         |

### Kinetic analysis of thermal back-reaction

The reaction kinetics of the thermal back-reaction was analyzed as follows: If the thermal back-reaction from the closed-ring isomer to the open-ring isomer obey a first-order kinetics, the kinetic equation is expressed as following equation by using Lambert-Beer law.

$$\ln \frac{A_t}{A_0} = -kt$$

where  $k$  is reaction rate constant,  $t$  is reaction time, and  $A_0$  and  $A_t$  are absorbance of the closed-ring isomer at initial state ( $t = 0$  s) and at arbitrary reaction time  $t$ , respectively. The  $k$  value can be calculated from the slope of the linear plot. The calculated  $k$  values are summarized in Table S5 and S6.

Arrhenius equation can be described as follows.

$$\ln k = \ln A - \frac{E_a}{RT}$$

where  $A$  is frequency factor,  $E_a$  is activation energy,  $R$  is gas constant, and  $T$  is absolute temperature. The linear relationship can be obtained by plotting  $\ln k$  relative to  $1/T$  as shown in Figure 6. The  $E_a$  and  $A$  values can be determined from the slope and intercept of the linear plot. The results are summarized in Table 4.

Eyring equation can be described as follows.

$$\ln\left(\frac{k}{T}\right) = -\frac{\Delta H^\ddagger}{R} \frac{1}{T} + \ln\frac{k_B}{h} + \frac{\Delta S^\ddagger}{R}$$

where  $\Delta H^\ddagger$  is enthalpy of activation,  $\Delta S^\ddagger$  is entropy of activation, and  $k_B$  is Boltzmann constant. The linear relationship can be obtained by plotting  $\ln(k/T)$  relative to  $1/T$  as shown in Figures S5–S7. The  $\Delta H^\ddagger$  and  $\Delta S^\ddagger$  values can be determined from the slope and intercept of the linear plot. The Gibbs energy of activation ( $\Delta G^\ddagger$ ) was also determined using the relationship of  $\Delta G^\ddagger = \Delta H^\ddagger - T\Delta S^\ddagger$ . The results are summarized in Table S8.

**Table S5.** First-order rate constants for the thermal back-reaction of **5b**.

| <i>T</i> /K | <i>k</i> /s <sup>-1</sup> |
|-------------|---------------------------|
| 238         | 0.002630                  |
| 233         | 0.001267                  |
| 228         | 0.000591                  |
| 223         | 0.000267                  |

**Table S6.** First-order rate constants for the thermal back-reaction of **6b**.

| <i>T</i> /K | <i>k</i> /s <sup>-1</sup> |
|-------------|---------------------------|
| 228         | 0.003179                  |
| 223         | 0.001542                  |
| 218         | 0.000746                  |
| 213         | 0.000304                  |

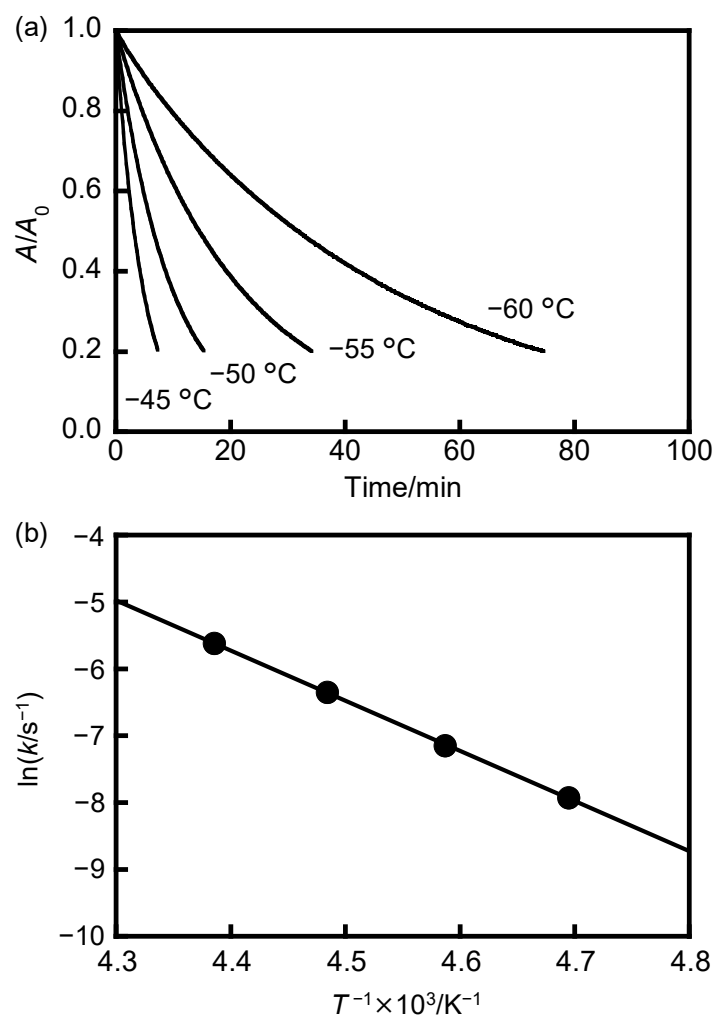

**Figure S4.** (a) Absorption decay curves at  $\lambda_{\max}$  for **1b** in THF at various temperatures and (b) temperature dependence of the rate constant ( $k$ ) for thermal back-reaction of **1b**.

**Table S7.** First-order rate constants for the thermal back-reaction of **1b**.

| $T/K$ | $k/s^{-1}$ |
|-------|------------|
| 228   | 0.003624   |
| 223   | 0.001750   |
| 218   | 0.000787   |
| 213   | 0.000361   |

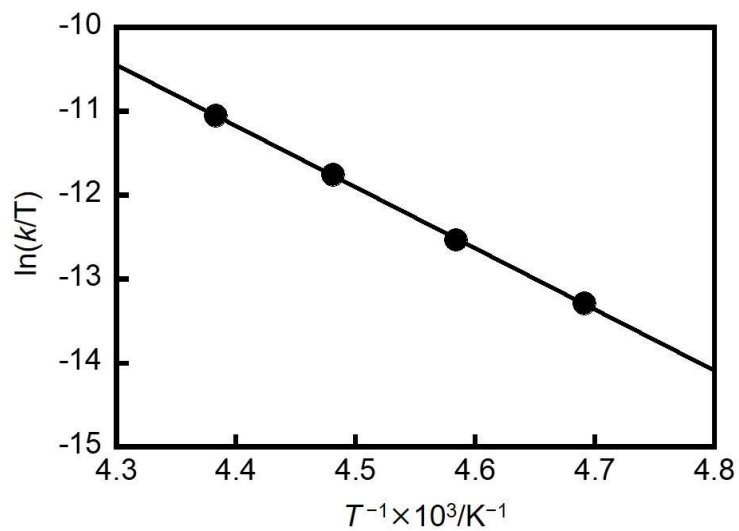

**Figure S5.** Eyring plot for the thermal back-reaction of **1b**.

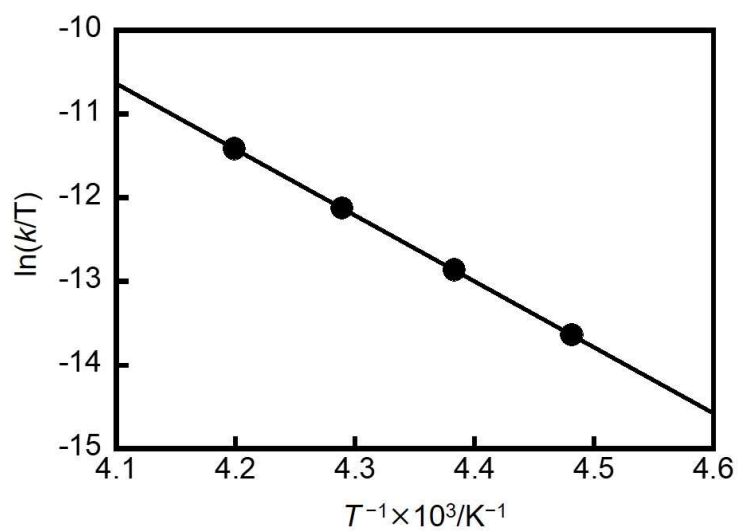

**Figure S6.** Eyring plot for the thermal back-reaction of **5b**.

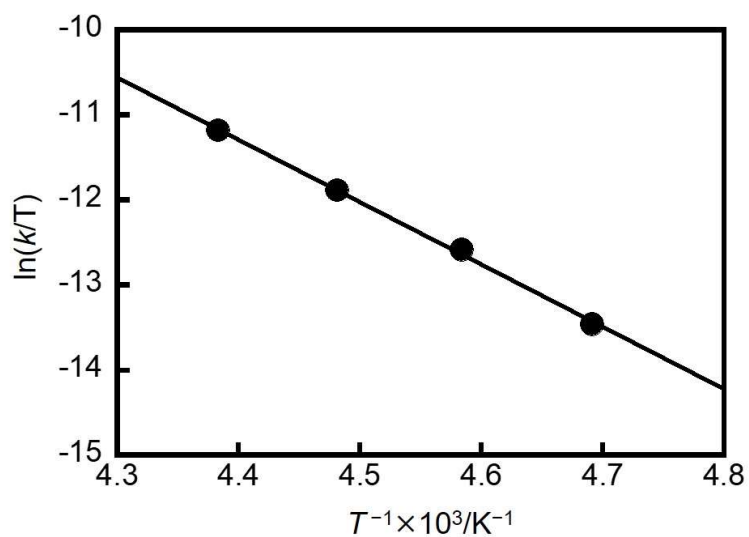

**Figure S7.** Eyring plot for the thermal back-reaction of **6b**.

**Table S8.**  $\Delta H^\ddagger$ ,  $\Delta S^\ddagger$ , and  $\Delta G^\ddagger$  values for **1**, **5**, and **6** estimated from the Eyring plot.

| Compound | $\Delta H^\ddagger / \text{kJ mol}^{-1}$ | $\Delta S^\ddagger / \text{J K}^{-1} \text{ mol}^{-1}$ | $\Delta G^\ddagger / \text{kJ mol}^{-1}$ at 25 °C |
|----------|------------------------------------------|--------------------------------------------------------|---------------------------------------------------|
| <b>1</b> | 60.6                                     | -23.9                                                  | 67.7                                              |
| <b>5</b> | 65.5                                     | -17.5                                                  | 70.7                                              |
| <b>6</b> | 61.0                                     | -22.9                                                  | 67.8                                              |

**Table S9.** Cartesian coordinates of **1a** optimized at the M06-2X/6-31G(d) level.

| Atom | X/Å       | Y/Å       | Z/Å       |
|------|-----------|-----------|-----------|
| C    | -0.653589 | 1.686643  | 0.269377  |
| C    | 0.653587  | 1.686641  | -0.269374 |
| C    | 1.272635  | 2.913970  | -0.506794 |
| C    | 0.644333  | 4.124730  | -0.254271 |
| C    | -0.644332 | 4.124732  | 0.254266  |
| C    | -1.272635 | 2.913974  | 0.506793  |
| C    | -1.419057 | 0.456306  | 0.580414  |
| C    | -2.736745 | 0.230660  | 0.064073  |
| C    | -3.262928 | -0.980078 | 0.409719  |
| H    | -3.248249 | 0.938963  | -0.578981 |
| C    | 1.419053  | 0.456302  | -0.580408 |
| C    | 2.736741  | 0.230657  | -0.064067 |
| C    | 3.262928  | -0.980078 | -0.409718 |
| H    | 3.248244  | 0.938960  | 0.578988  |
| S    | -2.140847 | -1.855340 | 1.409031  |
| S    | 2.140847  | -1.855341 | -1.409029 |
| C    | -0.965467 | -0.587451 | 1.346590  |
| C    | 0.965466  | -0.587453 | -1.346589 |
| C    | 0.328279  | -0.733005 | 2.085862  |



|   |           |           |           |
|---|-----------|-----------|-----------|
| H | 1.033447  | -1.371447 | 1.540968  |
| H | 0.797322  | 0.245737  | 2.215882  |
| H | 0.166211  | -1.169064 | 3.075905  |
| C | -0.328280 | -0.733007 | -2.085862 |
| H | -1.033453 | -1.371439 | -1.540962 |
| H | -0.797317 | 0.245737  | -2.215891 |
| H | -0.166213 | -1.169078 | -3.075899 |
| F | -2.507548 | 2.959801  | 1.015461  |
| F | -1.263539 | 5.273577  | 0.507396  |
| F | 1.263543  | 5.273573  | -0.507405 |
| F | 2.507548  | 2.959793  | -1.015462 |
| C | 4.569034  | -1.544155 | -0.041243 |
| C | 4.755933  | -2.926235 | 0.080233  |
| C | 5.654116  | -0.693454 | 0.205872  |
| C | 5.994271  | -3.443753 | 0.442777  |
| H | 3.919546  | -3.598449 | -0.093899 |
| C | 6.887625  | -1.212637 | 0.579642  |
| H | 5.529706  | 0.378320  | 0.081340  |
| C | 7.063637  | -2.589537 | 0.698534  |
| C | -4.569033 | -1.544156 | 0.041243  |
| C | -4.755930 | -2.926236 | -0.080240 |
| C | -5.654117 | -0.693456 | -0.205866 |

|   |           |           |           |
|---|-----------|-----------|-----------|
| C | -5.994268 | -3.443755 | -0.442784 |
| H | -3.919542 | -3.598449 | 0.093889  |
| C | -6.887626 | -1.212640 | -0.579637 |
| H | -5.529709 | 0.378318  | -0.081329 |
| C | -7.063636 | -2.589539 | -0.698536 |
| H | -8.029196 | -2.993711 | -0.985920 |
| H | 8.029198  | -2.993708 | 0.985918  |
| H | -7.718312 | -0.539073 | -0.767090 |
| H | -6.121025 | -4.518158 | -0.534347 |
| H | 6.121030  | -4.518156 | 0.534335  |
| H | 7.718310  | -0.539070 | 0.767099  |

---

**Table S10.** Cartesian coordinates of **1b** optimized at the M06-2X/6-31G(d) level.

| Atom | X/Å       | Y/Å       | Z/Å       |
|------|-----------|-----------|-----------|
| C    | -0.740019 | 1.767262  | -0.000393 |
| C    | 0.740020  | 1.767264  | 0.000395  |
| C    | 1.396598  | 3.049966  | 0.103103  |
| C    | 0.716290  | 4.212823  | 0.059481  |
| C    | -0.716299 | 4.212820  | -0.059481 |
| C    | -1.396602 | 3.049961  | -0.103102 |
| C    | -1.427705 | 0.582406  | 0.119438  |
| C    | -2.834236 | 0.312933  | 0.074410  |
| C    | -3.160515 | -1.007519 | 0.053503  |
| H    | -3.582487 | 1.089333  | 0.004798  |
| C    | 1.427707  | 0.582408  | -0.119435 |
| C    | 2.834238  | 0.312934  | -0.074409 |
| C    | 3.160517  | -1.007518 | -0.053501 |
| H    | 3.582490  | 1.089333  | -0.004799 |
| S    | -1.763637 | -2.089238 | 0.056274  |
| C    | -0.630435 | -0.681282 | 0.430823  |
| C    | 0.630438  | -0.681281 | -0.430818 |
| C    | -0.351181 | -0.696146 | 1.949679  |
| H    | 0.166792  | -1.609661 | 2.246423  |
| H    | 0.258432  | 0.166720  | 2.232853  |

|   |           |           |           |
|---|-----------|-----------|-----------|
| H | -1.305917 | -0.642225 | 2.478292  |
| C | 0.351181  | -0.696142 | -1.949673 |
| H | -0.166769 | -1.609668 | -2.246422 |
| H | -0.258455 | 0.166711  | -2.232840 |
| H | 1.305915  | -0.642193 | -2.478288 |
| F | -2.731952 | 3.096112  | -0.195721 |
| F | -1.330140 | 5.392142  | -0.122753 |
| F | 1.330127  | 5.392147  | 0.122753  |
| F | 2.731948  | 3.096125  | 0.195724  |
| C | 4.514208  | -1.570514 | -0.007858 |
| C | 4.732094  | -2.883125 | 0.430901  |
| C | 5.618942  | -0.801568 | -0.404272 |
| C | 6.017906  | -3.407864 | 0.485239  |
| H | 3.890082  | -3.493823 | 0.745364  |
| C | 6.902262  | -1.327435 | -0.347246 |
| H | 5.465399  | 0.204777  | -0.781080 |
| H | 6.168315  | -4.425062 | 0.832918  |
| H | 7.745731  | -0.720432 | -0.660948 |
| C | -4.514206 | -1.570516 | 0.007857  |
| C | -4.732087 | -2.883131 | -0.430892 |
| C | -5.618943 | -0.801568 | 0.404257  |
| C | -6.017898 | -3.407873 | -0.485234 |

|   |           |           |           |
|---|-----------|-----------|-----------|
| H | -3.890072 | -3.493831 | -0.745344 |
| C | -6.902262 | -1.327437 | 0.347227  |
| H | -5.465405 | 0.204780  | 0.781057  |
| H | -6.168304 | -4.425074 | -0.832905 |
| H | -7.745734 | -0.720433 | 0.660918  |
| S | 1.763639  | -2.089237 | -0.056271 |
| C | 7.107388  | -2.632141 | 0.098813  |
| H | 8.111318  | -3.042901 | 0.139557  |
| C | -7.107384 | -2.632147 | -0.098822 |
| H | -8.111313 | -3.042908 | -0.139569 |

---

**Table S11.** Cartesian coordinates of transition state of **1** optimized at the M06-2X/6-31G(d) level.

| Atom | X/Å       | Y/Å       | Z/Å       |
|------|-----------|-----------|-----------|
| C    | 0.635212  | 1.865161  | 0.324418  |
| C    | -0.635222 | 1.865170  | -0.324453 |
| C    | -1.224100 | 3.083997  | -0.624799 |
| C    | -0.615738 | 4.299243  | -0.312671 |
| C    | 0.615739  | 4.299235  | 0.312671  |
| C    | 1.224095  | 3.083982  | 0.624782  |
| C    | 1.316281  | 0.590981  | 0.608983  |
| C    | 2.669078  | 0.341280  | 0.385600  |
| C    | 3.029334  | -0.998425 | 0.469726  |
| H    | 3.378366  | 1.117262  | 0.115005  |
| C    | -1.316298 | 0.590998  | -0.609040 |
| C    | -2.669091 | 0.341295  | -0.385640 |
| C    | -3.029352 | -0.998408 | -0.469794 |
| H    | -3.378373 | 1.117273  | -0.115017 |
| S    | 1.646679  | -1.986274 | 0.886428  |
| S    | -1.646707 | -1.986248 | -0.886547 |
| C    | 0.524807  | -0.600720 | 0.832969  |
| C    | -0.524829 | -0.600699 | -0.833061 |
| C    | -0.511118 | -0.637139 | 1.940661  |
| H    | -0.003942 | -0.669522 | 2.908466  |

|   |           |           |           |
|---|-----------|-----------|-----------|
| H | -1.136655 | 0.257180  | 1.912994  |
| H | -1.154601 | -1.518376 | 1.856209  |
| C | 0.511095  | -0.637098 | -1.940754 |
| H | 0.003921  | -0.669430 | -2.908562 |
| H | 1.136655  | 0.257205  | -1.913050 |
| H | 1.154557  | -1.518353 | -1.856337 |
| F | 2.410617  | 3.134647  | 1.239127  |
| F | 1.214845  | 5.445783  | 0.618920  |
| F | -1.214837 | 5.445799  | -0.618904 |
| F | -2.410621 | 3.134676  | -1.239143 |
| C | 4.308436  | -1.591871 | 0.207882  |
| C | 4.652821  | -2.924524 | 0.216792  |
| C | 6.020065  | -3.150262 | -0.096077 |
| H | 3.942969  | -3.714150 | 0.438710  |
| C | 6.722276  | -2.004207 | -0.341125 |
| H | 6.476195  | -4.133321 | -0.139286 |
| C | -4.308446 | -1.591858 | -0.207924 |
| C | -4.652855 | -2.924505 | -0.216954 |
| C | -6.020075 | -3.150255 | 0.096012  |
| H | -3.943040 | -3.714118 | -0.439031 |
| C | -6.722242 | -2.004215 | 0.341259  |
| H | -6.476220 | -4.133309 | 0.139144  |

|   |           |           |           |
|---|-----------|-----------|-----------|
| S | 5.697673  | -0.610975 | -0.193130 |
| S | -5.697628 | -0.610985 | 0.193334  |
| C | 8.170106  | -1.859796 | -0.691835 |
| H | 8.710778  | -1.274544 | 0.058990  |
| H | 8.631476  | -2.848826 | -0.748282 |
| H | 8.304468  | -1.366598 | -1.659847 |
| C | -8.170039 | -1.859820 | 0.692115  |
| H | -8.710777 | -1.274503 | -0.058612 |
| H | -8.631411 | -2.848851 | 0.748524  |
| H | -8.304307 | -1.366699 | 1.660179  |

---



**Table S12.** Cartesian coordinates of **5a** optimized at the M06-2X/6-31G(d) level.

| Atom | X/Å       | Y/Å       | Z/Å       |
|------|-----------|-----------|-----------|
| C    | 0.632026  | 1.772497  | -0.316772 |
| C    | -0.632020 | 1.772583  | 0.316784  |
| C    | -1.232798 | 2.999430  | 0.598259  |
| C    | -0.624289 | 4.209799  | 0.299816  |
| C    | 0.624479  | 4.209715  | -0.300082 |
| C    | 1.232895  | 2.999266  | -0.598386 |
| C    | 1.365865  | 0.539356  | -0.688601 |
| C    | 2.721959  | 0.306865  | -0.286920 |
| C    | 3.212269  | -0.900150 | -0.694699 |
| H    | 3.307155  | 1.024411  | 0.278814  |
| C    | -1.365953 | 0.539539  | 0.688753  |
| C    | -2.722043 | 0.307064  | 0.287052  |
| C    | -3.212393 | -0.899912 | 0.694900  |
| H    | -3.307195 | 1.024553  | -0.278798 |
| S    | 2.004843  | -1.770909 | -1.594632 |
| S    | -2.005065 | -1.770590 | 1.595036  |
| C    | 0.849196  | -0.491176 | -1.431995 |
| C    | -0.849347 | -0.490935 | 1.432271  |
| C    | -0.497265 | -0.621373 | -2.073344 |
| H    | -1.156222 | -1.279132 | -1.494867 |

|   |           |           |           |
|---|-----------|-----------|-----------|
| H | -0.977338 | 0.358329  | -2.139289 |
| H | -0.409540 | -1.028909 | -3.084621 |
| C | 0.497103  | -0.621117 | 2.073644  |
| H | 1.156003  | -1.279058 | 1.495307  |
| H | 0.977264  | 0.358554  | 2.139381  |
| H | 0.409346  | -1.028434 | 3.085008  |
| F | 2.427816  | 3.044895  | -1.193612 |
| F | 1.223557  | 5.358797  | -0.596004 |
| F | -1.223279 | 5.358961  | 0.595599  |
| F | -2.427716 | 3.045221  | 1.193478  |
| C | 4.524188  | -1.478451 | -0.456176 |
| C | 5.188784  | -2.430061 | -1.180557 |
| C | 6.467420  | -2.750363 | -0.637873 |
| H | 4.783275  | -2.870003 | -2.085315 |
| C | 6.772370  | -2.045559 | 0.489821  |
| H | 7.146316  | -3.474778 | -1.074387 |
| C | -4.524298 | -1.478221 | 0.456309  |
| C | -5.189178 | -2.429426 | 1.180958  |
| C | -6.467692 | -2.749878 | 0.638070  |
| H | -4.783952 | -2.868964 | 2.086039  |
| C | -6.772276 | -2.045577 | -0.490040 |
| H | -7.146761 | -3.474043 | 1.074732  |

|   |           |           |           |
|---|-----------|-----------|-----------|
| C | -8.019624 | -2.108611 | -1.316290 |
| H | -8.698498 | -2.854385 | -0.895429 |
| H | -8.540985 | -1.146180 | -1.333429 |
| H | -7.804812 | -2.390471 | -2.351942 |
| C | 8.019936  | -2.108309 | 1.315766  |
| H | 8.698636  | -2.854331 | 0.895063  |
| H | 8.541382  | -1.145915 | 1.332319  |
| H | 7.805376  | -2.389675 | 2.351604  |
| S | -5.471600 | -0.979237 | -0.916025 |
| S | 5.471900  | -0.978914 | 0.915661  |

---

**Table S13.** Cartesian coordinates of **5b** optimized at the M06-2X/6-31G(d) level.

| Atom | X/Å       | Y/Å       | Z/Å       |
|------|-----------|-----------|-----------|
| C    | -0.003217 | -0.739112 | 1.797720  |
| C    | 0.003217  | 0.739112  | 1.797720  |
| C    | 0.104648  | 1.395598  | 3.079397  |
| C    | 0.060594  | 0.715732  | 4.243184  |
| C    | -0.060594 | -0.715732 | 4.243184  |
| C    | -0.104648 | -1.395598 | 3.079397  |
| C    | 0.109011  | -1.429910 | 0.612020  |
| C    | 0.076152  | -2.834713 | 0.346276  |
| C    | 0.058240  | -3.159265 | -0.977138 |
| H    | 0.050332  | -3.588278 | 1.122394  |
| C    | -0.109011 | 1.429910  | 0.612020  |
| C    | -0.076152 | 2.834713  | 0.346276  |
| C    | -0.058240 | 3.159265  | -0.977138 |
| H    | -0.050332 | 3.588278  | 1.122394  |
| S    | 0.033045  | -1.762250 | -2.059560 |
| C    | 0.426110  | -0.634074 | -0.652012 |
| C    | -0.426110 | 0.634074  | -0.652012 |
| C    | 1.946374  | -0.366696 | -0.666534 |
| H    | 2.247565  | 0.147750  | -1.580510 |
| H    | 2.233570  | 0.242701  | 0.195241  |

|   |           |           |           |
|---|-----------|-----------|-----------|
| H | 2.467408  | -1.325495 | -0.610174 |
| C | -1.946374 | 0.366696  | -0.666534 |
| H | -2.247565 | -0.147750 | -1.580510 |
| H | -2.233570 | -0.242701 | 0.195241  |
| H | -2.467408 | 1.325495  | -0.610174 |
| F | -0.201742 | -2.730457 | 3.124098  |
| F | -0.125849 | -1.330486 | 5.422066  |
| F | 0.125849  | 1.330486  | 5.422066  |
| F | 0.201742  | 2.730457  | 3.124098  |
| S | -0.033045 | 1.762250  | -2.059560 |
| C | 0.038276  | -4.482971 | -1.553443 |
| C | 0.084851  | -4.820649 | -2.883303 |
| C | 0.049333  | -6.223685 | -3.104267 |
| H | 0.153979  | -4.081949 | -3.674556 |
| C | -0.023737 | -6.952513 | -1.950244 |
| H | 0.079378  | -6.684009 | -4.085538 |
| C | -0.038276 | 4.482971  | -1.553443 |
| C | -0.084851 | 4.820649  | -2.883303 |
| C | -0.049333 | 6.223685  | -3.104267 |
| H | -0.153979 | 4.081949  | -3.674556 |
| C | 0.023737  | 6.952513  | -1.950244 |
| H | -0.079378 | 6.684009  | -4.085538 |

|   |           |           |           |
|---|-----------|-----------|-----------|
| S | -0.049333 | -5.914414 | -0.562679 |
| S | 0.049333  | 5.914414  | -0.562679 |
| C | 0.080526  | 8.440632  | -1.797263 |
| H | 1.010415  | 8.760032  | -1.316107 |
| H | 0.027258  | 8.911479  | -2.781849 |
| H | -0.753253 | 8.814761  | -1.194914 |
| C | -0.080526 | -8.440632 | -1.797263 |
| H | -0.027258 | -8.911479 | -2.781849 |
| H | 0.753253  | -8.814761 | -1.194914 |
| H | -1.010415 | -8.760032 | -1.316107 |

---

**Table S14.** Cartesian coordinates of transition state of **5** optimized at the M06-2X/6-31G(d) level.

| Atom | X/Å       | Y/Å       | Z/Å       |
|------|-----------|-----------|-----------|
| C    | 0.635212  | 1.865161  | 0.324418  |
| C    | -0.635222 | 1.865170  | -0.324453 |
| C    | -1.224100 | 3.083997  | -0.624799 |
| C    | -0.615738 | 4.299243  | -0.312671 |
| C    | 0.615739  | 4.299235  | 0.312671  |
| C    | 1.224095  | 3.083982  | 0.624782  |
| C    | 1.316281  | 0.590981  | 0.608983  |
| C    | 2.669078  | 0.341280  | 0.385600  |
| C    | 3.029334  | -0.998425 | 0.469726  |
| H    | 3.378366  | 1.117262  | 0.115005  |
| C    | -1.316298 | 0.590998  | -0.609040 |
| C    | -2.669091 | 0.341295  | -0.385640 |
| C    | -3.029352 | -0.998408 | -0.469794 |
| H    | -3.378373 | 1.117273  | -0.115017 |
| S    | 1.646679  | -1.986274 | 0.886428  |
| S    | -1.646707 | -1.986248 | -0.886547 |
| C    | 0.524807  | -0.600720 | 0.832969  |
| C    | -0.524829 | -0.600699 | -0.833061 |
| C    | -0.511118 | -0.637139 | 1.940661  |
| H    | -0.003942 | -0.669522 | 2.908466  |

|   |           |           |           |
|---|-----------|-----------|-----------|
| H | -1.136655 | 0.257180  | 1.912994  |
| H | -1.154601 | -1.518376 | 1.856209  |
| C | 0.511095  | -0.637098 | -1.940754 |
| H | 0.003921  | -0.669430 | -2.908562 |
| H | 1.136655  | 0.257205  | -1.913050 |
| H | 1.154557  | -1.518353 | -1.856337 |
| F | 2.410617  | 3.134647  | 1.239127  |
| F | 1.214845  | 5.445783  | 0.618920  |
| F | -1.214837 | 5.445799  | -0.618904 |
| F | -2.410621 | 3.134676  | -1.239143 |
| C | 4.308436  | -1.591871 | 0.207882  |
| C | 4.652821  | -2.924524 | 0.216792  |
| C | 6.020065  | -3.150262 | -0.096077 |
| H | 3.942969  | -3.714150 | 0.438710  |
| C | 6.722276  | -2.004207 | -0.341125 |
| H | 6.476195  | -4.133321 | -0.139286 |
| C | -4.308446 | -1.591858 | -0.207924 |
| C | -4.652855 | -2.924505 | -0.216954 |
| C | -6.020075 | -3.150255 | 0.096012  |
| H | -3.943040 | -3.714118 | -0.439031 |
| C | -6.722242 | -2.004215 | 0.341259  |
| H | -6.476220 | -4.133309 | 0.139144  |



|   |           |           |           |
|---|-----------|-----------|-----------|
| S | 5.697673  | -0.610975 | -0.193130 |
| S | -5.697628 | -0.610985 | 0.193334  |
| C | 8.170106  | -1.859796 | -0.691835 |
| H | 8.710778  | -1.274544 | 0.058990  |
| H | 8.631476  | -2.848826 | -0.748282 |
| H | 8.304468  | -1.366598 | -1.659847 |
| C | -8.170039 | -1.859820 | 0.692115  |
| H | -8.710777 | -1.274503 | -0.058612 |
| H | -8.631411 | -2.848851 | 0.748524  |
| H | -8.304307 | -1.366699 | 1.660179  |

---

**Table S15.** Cartesian coordinates of **6a** optimized at the M06-2X/6-31G(d) level.

| Atom | X/Å       | Y/Å       | Z/Å       |
|------|-----------|-----------|-----------|
| C    | -0.592761 | 2.109981  | 0.385603  |
| C    | 0.592756  | 2.109931  | -0.385574 |
| C    | 1.160275  | 3.336854  | -0.728779 |
| C    | 0.588904  | 4.547211  | -0.365012 |
| C    | -0.588830 | 4.547260  | 0.364847  |
| C    | -1.160241 | 3.336950  | 0.728710  |
| C    | -1.278004 | 0.877651  | 0.841976  |
| C    | -2.674006 | 0.651814  | 0.611106  |
| C    | -3.116362 | -0.554260 | 1.074629  |
| H    | -3.320354 | 1.375654  | 0.125454  |
| C    | 1.277964  | 0.877548  | -0.841854 |
| C    | 2.673969  | 0.651711  | -0.611009 |
| C    | 3.116304  | -0.554392 | -1.074479 |
| H    | 3.320341  | 1.375579  | -0.125429 |
| S    | -1.811435 | -1.431155 | 1.819544  |
| S    | 1.811335  | -1.431340 | -1.819258 |
| C    | -0.678870 | -0.155558 | 1.517448  |
| C    | 0.678806  | -0.155688 | -1.517264 |
| C    | 0.736494  | -0.293157 | 1.985480  |
| H    | 1.323675  | -0.929837 | 1.313257  |

|   |           |           |           |
|---|-----------|-----------|-----------|
| H | 1.216152  | 0.688607  | 2.017285  |
| H | 0.776214  | -0.726044 | 2.989152  |
| C | -0.736564 | -0.293286 | -1.985282 |
| H | -1.323769 | -0.929864 | -1.312984 |
| H | -1.216183 | 0.688493  | -2.017209 |
| H | -0.776302 | -0.726296 | -2.988900 |
| F | -2.283718 | 3.383958  | 1.450316  |
| F | -1.154115 | 5.695952  | 0.720721  |
| F | 1.154229  | 5.695857  | -0.720973 |
| F | 2.283757  | 3.383767  | -1.450383 |
| C | 4.452995  | -1.118442 | -1.010740 |
| C | 4.991402  | -2.136806 | -1.754363 |
| C | 6.346347  | -2.409835 | -1.426840 |
| H | 4.440772  | -2.652078 | -2.534108 |
| C | 6.841194  | -1.600654 | -0.437755 |
| H | 6.950617  | -3.153200 | -1.934203 |
| C | -4.453050 | -1.118316 | 1.010859  |
| C | -4.991500 | -2.136621 | 1.754532  |
| C | -6.346424 | -2.409679 | 1.426948  |
| H | -4.440918 | -2.651825 | 2.534355  |
| C | -6.841207 | -1.600592 | 0.437754  |
| H | -6.950725 | -3.153005 | 1.934332  |

|   |            |           |           |
|---|------------|-----------|-----------|
| C | 8.191839   | -1.586720 | 0.139097  |
| C | 8.746193   | -0.410968 | 0.660152  |
| C | 8.954804   | -2.761712 | 0.170795  |
| C | 10.028316  | -0.409624 | 1.196745  |
| H | 8.174409   | 0.512613  | 0.625340  |
| C | 10.240571  | -2.755056 | 0.697415  |
| H | 8.524743   | -3.686916 | -0.201468 |
| C | 10.782382  | -1.580187 | 1.214537  |
| H | 10.442436  | 0.512055  | 1.593673  |
| H | 10.817934  | -3.674318 | 0.714932  |
| H | 11.784953  | -1.578119 | 1.630503  |
| C | -8.191809  | -1.586725 | -0.139200 |
| C | -8.746147  | -0.411018 | -0.660375 |
| C | -8.954749  | -2.761734 | -0.170876 |
| C | -10.028228 | -0.409736 | -1.197066 |
| H | -8.174382  | 0.512576  | -0.625581 |
| C | -10.240476 | -2.755138 | -0.697594 |
| H | -8.524697  | -3.686903 | 0.201485  |
| C | -10.782270 | -1.580315 | -1.214838 |
| H | -10.442336 | 0.511908  | -1.594089 |
| H | -10.817819 | -3.674413 | -0.715093 |
| H | -11.784809 | -1.578294 | -1.630880 |

|   |           |           |           |
|---|-----------|-----------|-----------|
| S | -5.616834 | -0.500493 | -0.120841 |
| S | 5.616842  | -0.500533 | 0.120846  |

---

**Table S16.** Cartesian coordinates of **6b** optimized at the M06-2X/6-31G(d) level.

| Atom | X/Å       | Y/Å       | Z/Å       |
|------|-----------|-----------|-----------|
| C    | 0.739229  | 2.106424  | -0.052268 |
| C    | -0.738242 | 2.107037  | -0.047753 |
| C    | -1.395419 | 3.386007  | -0.169780 |
| C    | -0.715067 | 4.550586  | -0.154723 |
| C    | 0.716903  | 4.552478  | -0.045542 |
| C    | 1.396923  | 3.389242  | 0.016396  |
| C    | 1.428981  | 0.917293  | -0.142668 |
| C    | 2.832728  | 0.652572  | -0.108471 |
| C    | 3.157974  | -0.670775 | -0.061709 |
| H    | 3.586130  | 1.429223  | -0.097755 |
| C    | -1.428735 | 0.923612  | 0.095191  |
| C    | -2.833007 | 0.658853  | 0.079103  |
| C    | -3.158979 | -0.664998 | 0.095123  |
| H    | -3.585942 | 1.435081  | 0.041398  |
| S    | 1.761176  | -1.752692 | -0.010349 |
| C    | 0.630863  | -0.353297 | -0.426375 |
| C    | -0.630958 | -0.333389 | 0.434871  |
| C    | 0.352850  | -0.401376 | -1.944103 |
| H    | -0.164794 | -1.320997 | -2.221780 |
| H    | -0.257232 | 0.454872  | -2.246057 |

|   |           |           |           |
|---|-----------|-----------|-----------|
| H | 1.308032  | -0.357902 | -2.472905 |
| C | -0.352431 | -0.313884 | 1.953191  |
| H | 0.163966  | -1.221154 | 2.270841  |
| H | 0.259203  | 0.553740  | 2.217037  |
| H | -1.307285 | -0.245730 | 2.479973  |
| F | 2.732545  | 3.435686  | 0.100439  |
| F | 1.332556  | 5.731829  | -0.009803 |
| F | -1.330639 | 5.727620  | -0.238089 |
| F | -2.730984 | 3.429204  | -0.256347 |
| S | -1.763062 | -1.748803 | 0.082338  |
| C | -4.482885 | -1.238533 | 0.099951  |
| C | -4.821273 | -2.569239 | 0.184232  |
| C | -6.952068 | -1.634423 | 0.068218  |
| C | -6.219245 | -2.791627 | 0.165867  |
| H | -4.082057 | -3.357315 | 0.278304  |
| H | -6.675986 | -3.770252 | 0.257072  |
| C | 4.481802  | -1.243325 | -0.029970 |
| C | 4.820026  | -2.576022 | 0.011956  |
| C | 6.218078  | -2.796484 | 0.042020  |
| H | 4.080517  | -3.369529 | 0.026053  |
| C | 6.951598  | -1.635718 | 0.022449  |
| H | 6.672832  | -3.778013 | 0.108587  |

|   |            |           |           |
|---|------------|-----------|-----------|
| S | -5.909338  | -0.249104 | -0.011509 |
| S | 5.909786   | -0.249000 | -0.041793 |
| C | 8.412091   | -1.486960 | 0.044745  |
| C | 9.019713   | -0.350544 | 0.592940  |
| C | 9.225635   | -2.496595 | -0.486298 |
| C | 10.404160  | -0.228438 | 0.611341  |
| H | 8.402671   | 0.432547  | 1.025733  |
| C | 10.609436  | -2.376431 | -0.457203 |
| H | 8.765866   | -3.367137 | -0.944505 |
| C | 11.204394  | -1.241732 | 0.090154  |
| H | 10.858429  | 0.658093  | 1.042658  |
| H | 11.225782  | -3.166609 | -0.874810 |
| H | 12.285478  | -1.146644 | 0.107285  |
| C | -8.412308  | -1.488038 | 0.026219  |
| C | -9.041925  | -0.334110 | 0.509090  |
| C | -9.203520  | -2.517953 | -0.499345 |
| C | -10.426169 | -0.214664 | 0.469331  |
| H | -8.443124  | 0.465274  | 0.937673  |
| C | -10.587577 | -2.400047 | -0.528379 |
| H | -8.725640  | -3.403450 | -0.907745 |
| C | -11.204550 | -1.247869 | -0.045719 |
| H | -10.897482 | 0.685709  | 0.850913  |



|   |            |           |           |
|---|------------|-----------|-----------|
| H | -11.186230 | -3.206283 | -0.941042 |
| H | -12.285583 | -1.154823 | -0.074200 |

---

**Table S17.** Cartesian coordinates of transition state of **6** optimized at the M06-2X/6-31G(d) level.

| Atom | X/Å       | Y/Å       | Z/Å       |
|------|-----------|-----------|-----------|
| C    | 0.614781  | 2.204502  | 0.361705  |
| C    | -0.614785 | 2.204504  | -0.361721 |
| C    | -1.186366 | 3.423242  | -0.693997 |
| C    | -0.597379 | 4.638318  | -0.346646 |
| C    | 0.597374  | 4.638316  | 0.346648  |
| C    | 1.186361  | 3.423237  | 0.693990  |
| C    | 1.274981  | 0.929734  | 0.690806  |
| C    | 2.638514  | 0.678260  | 0.562461  |
| C    | 2.991199  | -0.662179 | 0.680351  |
| H    | 3.366885  | 1.452765  | 0.343832  |
| C    | -1.274985 | 0.929739  | -0.690829 |
| C    | -2.638518 | 0.678264  | -0.562483 |
| C    | -2.991203 | -0.662175 | -0.680380 |
| H    | -3.366889 | 1.452768  | -0.343848 |
| S    | 1.581073  | -1.647241 | 0.998712  |
| S    | -1.581078 | -1.647235 | -0.998750 |
| C    | 0.468588  | -0.260284 | 0.867393  |
| C    | -0.468593 | -0.260279 | -0.867424 |
| C    | -0.640302 | -0.292976 | 1.902090  |
| H    | -0.200647 | -0.337349 | 2.901843  |

|   |            |           |           |
|---|------------|-----------|-----------|
| H | -1.253330  | 0.608045  | 1.838851  |
| H | -1.285199  | -1.167069 | 1.767329  |
| C | 0.640297   | -0.292963 | -1.902123 |
| H | 0.200641   | -0.337335 | -2.901875 |
| H | 1.253321   | 0.608060  | -1.838882 |
| H | 1.285197   | -1.167055 | -1.767364 |
| F | 2.336183   | 3.474558  | 1.374592  |
| F | 1.178868   | 5.784524  | 0.684515  |
| F | -1.178873  | 5.784529  | -0.684505 |
| F | -2.336187  | 3.474567  | -1.374599 |
| C | -4.284810  | -1.256194 | -0.524436 |
| C | -4.634493  | -2.585651 | -0.642852 |
| C | -6.012522  | -2.822109 | -0.429269 |
| H | -3.918805  | -3.361820 | -0.891876 |
| C | -6.728362  | -1.684320 | -0.148163 |
| H | -6.474577  | -3.798894 | -0.515725 |
| C | -8.165566  | -1.558255 | 0.116435  |
| C | -8.855436  | -0.368473 | -0.150059 |
| C | -8.878185  | -2.643881 | 0.644100  |
| C | -10.218724 | -0.268623 | 0.101955  |
| H | -8.323084  | 0.477154  | -0.577806 |
| C | -10.242781 | -2.544864 | 0.884206  |

|   |            |           |           |
|---|------------|-----------|-----------|
| H | -8.350058  | -3.561005 | 0.887209  |
| C | -10.919120 | -1.356510 | 0.616278  |
| H | -10.736900 | 0.660740  | -0.113214 |
| H | -10.777952 | -3.395544 | 1.295125  |
| H | -11.984204 | -1.278407 | 0.810140  |
| S | -5.684596  | -0.293326 | -0.130990 |
| C | 4.284807   | -1.256197 | 0.524410  |
| C | 4.634486   | -2.585658 | 0.642803  |
| C | 6.012517   | -2.822113 | 0.429235  |
| H | 3.918792   | -3.361831 | 0.891800  |
| C | 6.728363   | -1.684320 | 0.148164  |
| H | 6.474570   | -3.798902 | 0.515677  |
| C | 8.165572   | -1.558252 | -0.116408 |
| C | 8.855440   | -0.368478 | 0.150126  |
| C | 8.878197   | -2.643868 | -0.644088 |
| C | 10.218733  | -0.268627 | -0.101863 |
| H | 8.323084   | 0.477140  | 0.577884  |
| C | 10.242797  | -2.544850 | -0.884168 |
| H | 8.350070   | -3.560984 | -0.887228 |
| C | 10.919135  | -1.356503 | -0.616199 |
| H | 10.736909  | 0.660729  | 0.113338  |
| H | 10.777972  | -3.395521 | -1.295098 |

|   |           |           |           |
|---|-----------|-----------|-----------|
| H | 11.984222 | -1.278400 | -0.810040 |
| S | 5.684600  | -0.293323 | 0.131005  |

---
